# Supplementary material for: AcrAB efflux pump impacts on the survival of adherent-invasive Escherichia coli strain LF82 inside macrophages
Source: PubMed Central journal article supplement (PMC9931695; doi:10.1038/s41598-023-29817-0), 2023-02-15
Supplement: 41598_2023_29817_MOESM1_ESM.pdf [file 41598_2023_29817_MOESM1_ESM.pdf]

## Supplementary Materials

Table S1 Strains and plasmid used in this study

| Strains                       | Characteristic                                                                                                                                                                                    | Source/References                |
|-------------------------------|---------------------------------------------------------------------------------------------------------------------------------------------------------------------------------------------------|----------------------------------|
| DH10b                         | [ <i>mcrA</i> ( <i>mrr</i> – <i>hsdRM</i> – <i>mcrBC</i> ) <i>lacX74 deoR recA1</i> ]                                                                                                             | <i>Sambrook and Russel, 2001</i> |
| LF82                          | AIEC clinical strain isolated from ileum biopsy of a CD patient used as prototype                                                                                                                 | <i>Boudeau et al., 1999</i>      |
| LF82 $\Delta$ <i>acrAB</i>    | LF82 derivative defective in <i>acrAB</i> genes, Km <sup>R</sup>                                                                                                                                  | This study                       |
| LF82 $\Delta$ <i>acrB</i>     | LF82 derivative defective in <i>acrB</i> gene, Km <sup>R</sup>                                                                                                                                    | This study                       |
| LF82 $\Delta$ <i>acrA</i>     | LF82 derivative defective in <i>acrA</i> gene, Km <sup>R</sup>                                                                                                                                    | This study                       |
| Plasmids                      |                                                                                                                                                                                                   |                                  |
| pKD46                         | Temperature sensitive replicon that carried bacteriophage $\lambda$ red genes ( $\gamma$ , $\beta$ and <i>exo</i> ) under control of arabinose inducible <i>ParaBAD</i> promoter, Ap <sup>R</sup> | <i>Datsenko and Wanner, 2000</i> |
| pKD13                         | Kan <sup>R</sup> containing plasmid, template for PCR                                                                                                                                             | <i>Datsenko and Wanner, 2000</i> |
| pKD4                          | $\pi$ -dependent plasmid carrying kanamycin resistance gene flanked by the recognition sites of the yeast FLP recombinase in direct repeats                                                       | <i>Datsenko and Wanner, 2000</i> |
| pGIP7                         | pACYC184-derived vector carrying <i>lacI-lac</i> promoter region, Cm <sup>R</sup>                                                                                                                 | <i>Falconi et al., 2001</i>      |
| <i>pacrAB</i>                 | pGIP7 derivative plasmid carrying the <i>acrAB</i> gene, Cm <sup>R</sup>                                                                                                                          | This study                       |
| <i>pacrB</i>                  | pGIP7 derivative plasmid carrying the <i>acrB</i> gene, Cm <sup>R</sup>                                                                                                                           | This study                       |
| <i>pacrB</i> <sup>D408A</sup> | pGIP7 derivative plasmid carrying the <i>acrB</i> <sup>D408A</sup> allele, Cm <sup>R</sup>                                                                                                        | This study                       |

**Table S2 Oligonucleotides used in this study**

| <b>Chromosomal mutations</b>      |                                                                             |
|-----------------------------------|-----------------------------------------------------------------------------|
| <b>Name</b>                       | <b>5'-3' sequences</b>                                                      |
| ABF                               | ACTTTTGACCATTGACCAATTTGAAATCGGACACTCGAGGTTTACAT<br>ATGTGTAGGCTGGAGCTGCTTCG  |
| ABR                               | TAGGCATGTCTTAACGGCTCCTGTTTAAGTTAAGACTTGGACTGTTC<br>AGGATTCCGGGGATCCGTCGACC  |
| BF                                | TATAAAAAAGGCCGCTTGC GCGGCCTTAGTGATTACACGTTGTATCA<br>ATGATTCCGGGGATCCGTCGACC |
| BR                                | CCTGAACAGTCCAAGTCTTAACCTTAAACAGGAGCCGTTAAGACATGCC<br>TATGTAGGCTGGAGCTGCTTCG |
| AF                                | ACTTTTGACCATTGACCAATTTGAAATCGGACACTCGAGGTTTACAT<br>ATGTGTAGGCTGGAGCTGCTTCG  |
| AR                                | TAGGCATGTCTTAACGGCTCCTGTTTAAGTTAAGACTTGGACTGTTC<br>AGGCATATGAATATCCTCCTTA   |
| <b>Construction of plasmids</b>   |                                                                             |
| <b>Name</b>                       | <b>5'-3' sequences</b>                                                      |
| p <i>AcacrABF</i>                 | NNGGATCCATGACCAATTTGAAATC                                                   |
| p <i>AcacrABR</i>                 | NNGGATCCTGAGTTGGTGGTTCAATACT                                                |
| p <i>AcacrBF</i>                  | NNGGATTCATGCCTAATTTCTTTATCGATCGC                                            |
| p <i>AcacrBR</i>                  | NNGGATTCGGATCCTGAGTTGGTGGTTCAATACT                                          |
| p <i>AcacrB<sup>D408A</sup> F</i> | CATCGGCCTGTTGGTGGATGCCGCTATCGTTGTGGTAGAAA                                   |
| p <i>AcacrB<sup>D408A</sup> R</i> | TTTCTACCACAACGATAGCGGCATCCACCAACAGGCCGATGG                                  |

Fig. S1

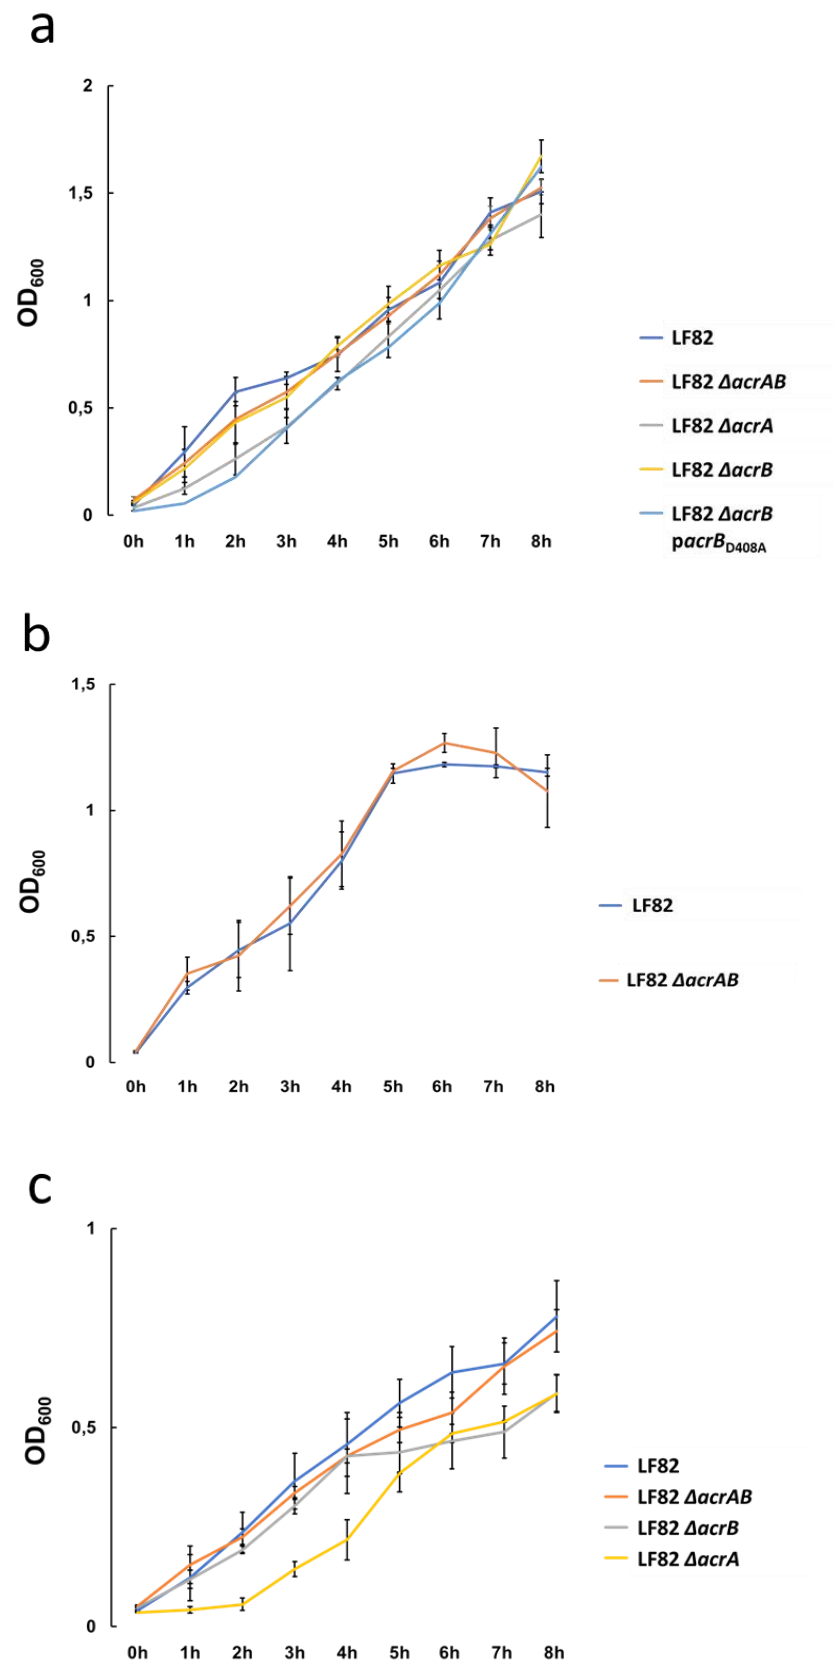

**Figure S1. Growth of LF82 and its derivatives.** AIEC LF82 and the indicated derivatives were grown in LB medium (a), DMEM (b) and RPMI (c). The results are the average of at least three independent experiments. Error bars represent the SD.

Fig. S2

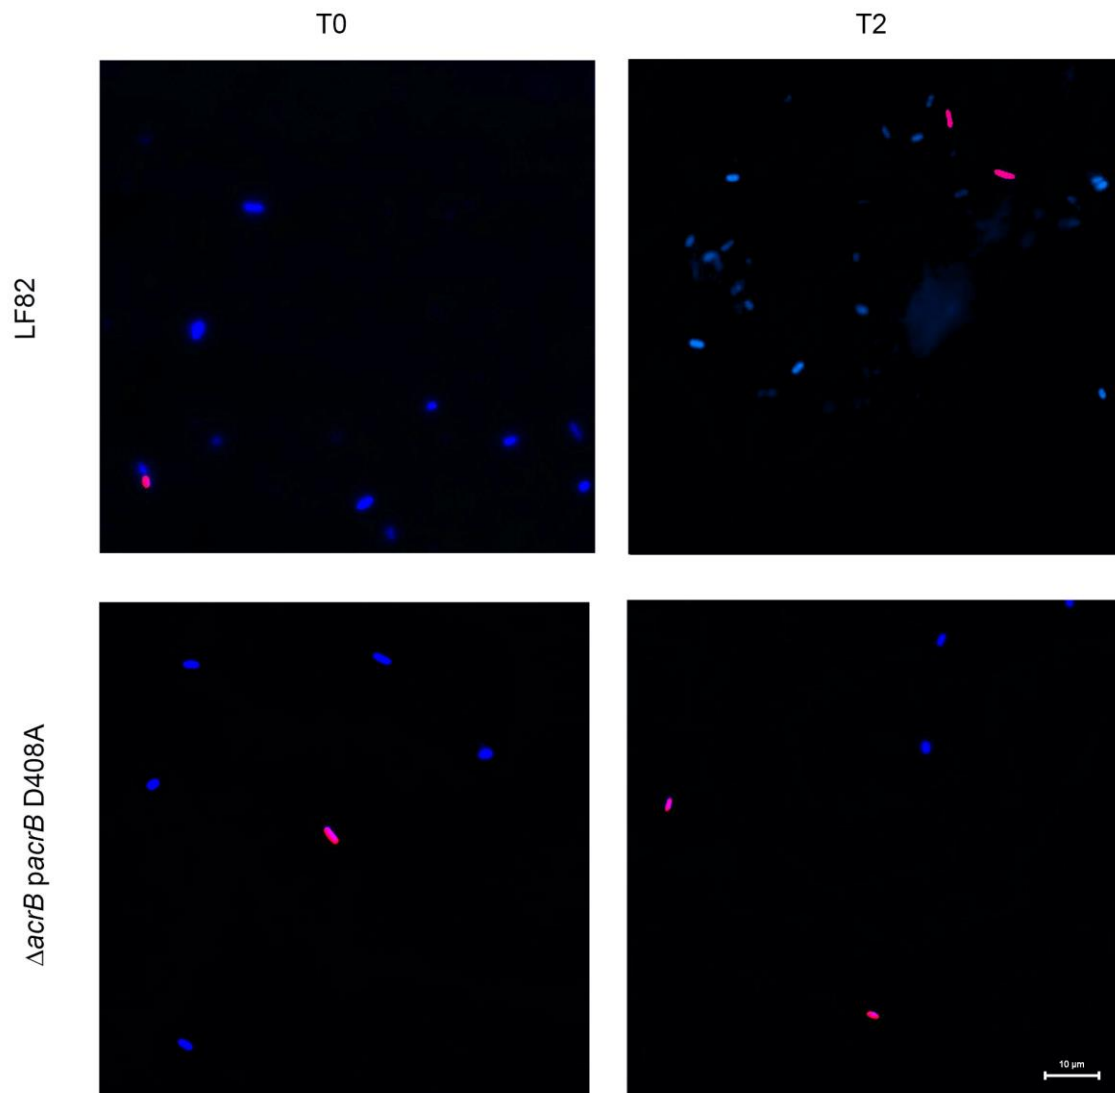

**Figure S2. Live and dead assay.** Images of DAPI (blue)/PI (red) double stained intracellular LF82 and LF82  $\DeltaacrB pacrB_{D408A}$  bacteria recovered at the indicated time points. The pink colored bacteria result from the overlapping of the red (PI) and blue (DAPI) colors and represent dead bacteria.
